# Supplementary material
Source: HighWire-hosted journal article supplement (https://erj.ersjournals.com/content/51/6/1800601)
Supplement: inline-supplementary-material-1 [file inline-supplementary-material-1.pdf]

## **Supplementary data**

## **Independent association between severe obstructive sleep apnoea and liver stiffness**

Wojciech Trzepizur<sup>1,2</sup>, Jérôme Boursier<sup>3,4</sup>, Marc Le Vaillant<sup>5</sup>, Pierre-Henri Ducluzeau<sup>6</sup>, Séverine Dubois<sup>7,2</sup>, Samir Henni<sup>8,9</sup>, Pierre Abraham<sup>8,9</sup>, Christophe Aubé<sup>10,4</sup>, Paul Calès<sup>3,4</sup>, Frédéric Gagnadoux<sup>1,2</sup>, on the behalf of the METABOL group.

<sup>1</sup> Département de Pneumologie, Centre Hospitalier Universitaire, Angers, France

<sup>2</sup> INSERM UMR 1063, Université d'Angers, France

<sup>3</sup> Département d'Hépto-Gastro-Entérologie Centre Hospitalier Universitaire, Angers, France

<sup>4</sup> HIFIH, EA3859, Université d'Angers, Angers, France

<sup>5</sup> Institut de Recherche en Santé Respiratoire des Pays de la Loire, Beaucouzé, France.

<sup>6</sup> Unité d'Endocrinologie-Diabétologie-Nutrition, Pole de Médecine, Centre Hospitalier Universitaire, Tours, France

<sup>7</sup> Département d'Endocrinologie, Diabétologie et Nutrition, Centre Hospitalier Universitaire, Angers, France

<sup>8</sup> Département de Médecine du Sport et Explorations Fonctionnelles Vasculaires, Centre Hospitalier Universitaire, Angers, France

<sup>9</sup> Institut MITOVASC, UMR CNRS 6015, INSERM 1083, Université d'Angers, Angers, France

<sup>10</sup> Département de Radiologie, Centre Hospitalier Universitaire, Angers, France

**Table S1: Unadjusted and adjusted odds ratios for having a liver stiffness measurement (LSM)≥9.6 kPa according to the severity of obstructive sleep apnoea and hypoxemia during sleep.**

| Variables | Unadjusted OR<br>(95% CI) | Adjusted OR (95% CI) |                   |                   |
|-----------|---------------------------|----------------------|-------------------|-------------------|
|           |                           | Model 1              | Model 2           | Model 3           |
| AHI, n    |                           |                      |                   |                   |
| <30       | 1                         | 1                    | 1                 | 1                 |
| ≥30       | 4.08 (1.20-13.88)         | 4.73 (1.17-19.06)    | 4.04 (1.11-14.68) | 4.73 (1.25-17.88) |
| ODI, n    |                           |                      |                   |                   |
| <19       | 1                         | 1                    | 1                 | 1                 |
| ≥19       | 3.63 (1.07-12.33)         | 5.17 (1.08-24.78)    | 3.61 (0.95-13.74) | 4.79 (1.18-19.54) |
| T90, %    |                           |                      |                   |                   |
| <2        | 1                         | 1                    | 1                 | 1                 |
| ≥2        | 1.67 (0.53 – 5.31)        | 1.54 (0.39-6.02)     | 1.32 (0.38-4.61)  | 1.49 (0.42-5.25)  |

Abbreviations: AHI, apnea-hypopnea index; ODI, oxygen desaturation index; T90, sleep time with oxygen saturation <90%

Model 1: adjusted for age, gender, waist circumference, diabetes and hypertension

Model 2: adjusted for age, gender and metabolic syndrome

Model 3: adjusted for age, gender, metabolic syndrome and homeostasis model assessment of insulin resistance
